# Supplementary material
Source: Springer Nature journal article supplement (https://www.springermedizin.de/resource/supplementary/12937_2010_364_MOESM2_ESM.pdf/25653210)

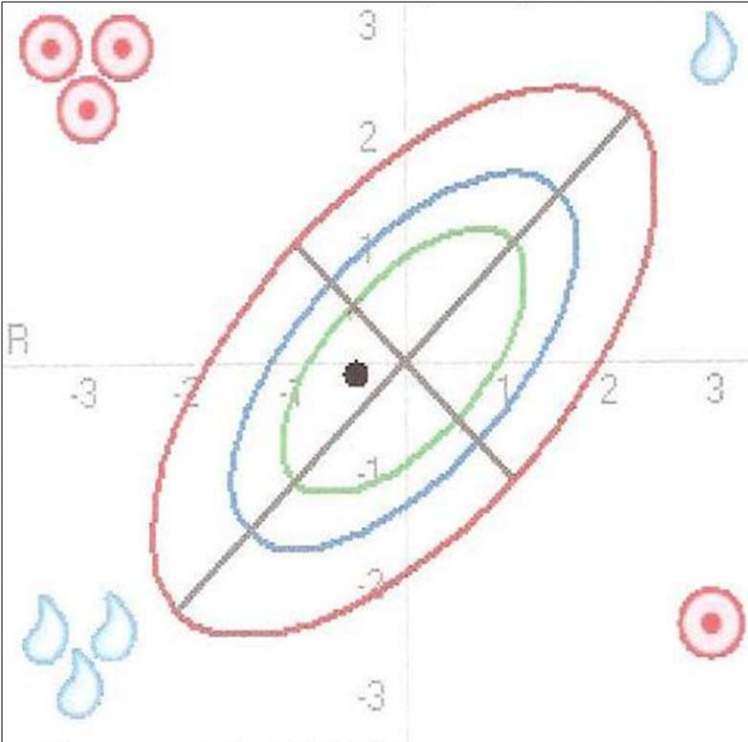

Supplement: MOESM2 [file 25653210]
